# Supplementary material
Source: ML conference proceedings conference paper supplement (https://openreview.net/forum?id=-TsO6HBDeA)
Supplement: supplementary_material [file attachment]

## A Proof of Theorem 5.3

In this section we present the main proof to Theorem 5.3. We define  $\epsilon_t = \mathbf{d}_t - \nabla F(\mathbf{x}_t)$  for simplicity.

To prove the main theorem, we need two groups of lemmas to charctrize the behavior of the Algorithm Pullback-STORM.

Next lemma provides the upper bound of  $\epsilon_t$ .

**Lemma A.1.** Set  $\eta \leq \sigma/(2bL)$ ,  $r \leq \sigma/(2bL)$  and  $\bar{D} \leq \sigma^2/(4b^2L^2)$ ,  $a = 56^2 \log(4/\delta)/b$ ,  $B = b^2, a \leq 1/4\ell_{\text{thres}}$ , with probability at least  $1 - 2\delta$ , for all  $t$  we have

$$\|\epsilon_t\|_2 \leq \frac{2^{10} \log(4/\delta) \sigma}{b}.$$

Furthermore, by the choice of  $b$  in Theorem 5.1 we have that  $\|\epsilon_t\|_2 \leq \epsilon/2$ .

*Proof.* See Appendix B.1. □

**Lemma A.2.** Suppose the event in Lemma A.1 holds and  $\eta \leq \epsilon/(2L)$ , then for any  $s$ , we have

$$F(\mathbf{x}_{t_s}) - F(\mathbf{x}_{m_s}) \geq \frac{(m_s - t_s)\eta\epsilon}{8}.$$

*Proof.* The proof is the same as that of Lemma 6.2, with the fact  $\|\epsilon_t\|_2 \leq \epsilon/2$  from Lemma A.1. □

The choice of  $\eta$  in Theorem 5.3 further implies that the loss decrease by  $\sigma\epsilon/(16bL)$  on average.

Next lemma shows that if  $\mathbf{x}_{m_s}$  is a saddle point, then with high probability, the algorithm will break during the Escape phase and set  $\text{FIND} \leftarrow \text{false}$ . Thus, whenever  $\mathbf{x}_{m_s}$  is not a local minimum, the algorithm cannot terminate.

**Lemma A.3.** Under Assumptions 3.1 and 3.2, set  $r \leq L\eta_H\epsilon_H/\rho$ ,  $a \leq \eta_H\epsilon_H$ ,  $b \geq \max\{16\log(4/\delta)\eta_H^{-2}L^{-2}\epsilon_H^{-2}, 56^2\log(4/\delta)a^{-1}\}$ ,  $\ell_{\text{thres}} = 2\log(8\epsilon_H\sqrt{d}\rho^{-1}\delta^{-1}r^{-1})/(\eta_H\epsilon_H)$ ,  $\eta_H \leq \min\{1/(10L\log(8\epsilon_H L\rho^{-1}r_0^{-1})), 1/(10L\log(\ell_{\text{thres}}))\}$  and  $\bar{D} < L^2\eta_H^2\epsilon_H^2/(\rho\ell_{\text{thres}}^2)$ . Then for any  $s$ , when  $\lambda_{\min}(\nabla^2 F(\mathbf{x}_{m_s})) \leq -\epsilon_H$ , with probability at least  $1 - 2\delta$  algorithm breaks in the Escape phase.

*Proof.* See Appendix B.2. □

Next lemma shows that Pullback-STORM decreases when it breaks.

**Lemma A.4** (localization). Suppose the event in Lemma A.1 holds, and  $r \leq \min\{\log(4/\delta)^2\eta_H\sigma^2/(4b^2\epsilon), \sqrt{2\log(4/\delta)^2\eta_H\sigma^2/(b^2L)}\}$ ,  $\eta_H \leq 1/(2^{12}L\log(4/\delta))$ ,  $\bar{D} = \sigma^2/(4b^2L^2)$ . Then for any  $s$ , when Pullback-STORM breaks, then  $\mathbf{x}_{m_s}$  satisfies

$$F(\mathbf{x}_{m_s}) - F(\mathbf{x}_{t_{s+1}}) \geq (t_{s+1} - m_s) \frac{\log(4/\delta)^2\eta_H\sigma^2}{b^2}. \quad (\text{A.1})$$

*Proof.* See Appendix B.3. □

With all above lemmas, we prove Theorem 5.3.

*Proof of Theorem 5.3.* Under the choice of parameter in Theorem 5.3, we have Lemma A.1 to A.4 hold. Now for GD phase, we know that the function value  $F$  decreases by  $\sigma\epsilon/(16bL)$  on average. For Escape phase, we know that the  $F$  decreases by  $\log(4/\delta)^2\eta_H\sigma^2/b^2$  on average. So Pullback-STORM can find  $(\epsilon, \epsilon_H)$ -approximate local minima within  $\tilde{O}(bL\Delta\sigma^{-1}\epsilon^{-1} + b^2L\Delta\sigma^{-2})$  iterations (we use the fact that  $\eta_H = \tilde{O}(L^{-1})$ ). Then the total number of stochastic gradient evaluations is bounded by  $\tilde{O}(B + b^2L\Delta\sigma^{-1}\epsilon^{-1} + b^3L\Delta\sigma^{-2})$ . Plugging in the choice of  $b = \tilde{O}(\sigma\epsilon^{-1} + \sigma\rho\epsilon_H^{-2})$  in Theorem 5.3, we have the total sample complexity

$$\tilde{O}\left(\frac{\sigma L \Delta}{\epsilon^3} + \frac{\sigma \rho^2 L \Delta}{\epsilon \epsilon_H^4} + \frac{\sigma \rho^3 L \Delta}{\epsilon_H^6}\right).$$

The proof finishes by using Young's inequality. □

## 451 **B Proof of Lemmas in Section A**

452 In this section we prove lemmas in Section A. Let filtration  $\mathcal{F}_{t,b}$  denote the all history before sample  
 453  $\xi_{t,b}$  at time  $t \in \{0, \dots, T\}$ , then it is obvious that  $\mathcal{F}_{0,1} \subseteq \mathcal{F}_{0,b} \subseteq \dots \subseteq \mathcal{F}_{1,1} \subseteq \dots \subseteq \mathcal{F}_{T,1} \subseteq \dots \subseteq$   
 454  $\mathcal{F}_{T,b}$ .

455 We also need the following fact:

456 **Proposition B.1.** For any  $t$ , we have the following equation:

$$\frac{\epsilon_{t+1}}{(1-a)^{t+1}} - \frac{\epsilon_t}{(1-a)^t} = \frac{1}{(1-a)^{t+1}} \sum_{i \leq b} \epsilon_{t,i},$$

457 where

$$\begin{aligned} \epsilon_{t,i} &= \frac{a}{b} [\nabla f(\mathbf{x}_{t+1}; \xi_{t+1}^i) - \nabla F(\mathbf{x}_{t+1})] \\ &\quad + \frac{1-a}{b} [\nabla F(\mathbf{x}_t) - \nabla f(\mathbf{x}_t; \xi_{t+1}^i) - \nabla F(\mathbf{x}_{t+1}) + \nabla f(\mathbf{x}_{t+1}; \xi_{t+1}^i)]. \end{aligned}$$

458 *Proof.* Following the update rule in Pullback-STORM, we could have the update rule of  $\epsilon$  described  
 459 as

$$\begin{aligned} \epsilon_{t+1} &= \frac{1-a}{b} \sum_{i \leq b} [\mathbf{d}_t - \nabla f(\mathbf{x}_t; \xi_{t+1}^i)] + \frac{1}{b} \sum_{i \leq b} [\nabla f(\mathbf{x}_{t+1}; \xi_{t+1}^i) - \nabla F(\mathbf{x}_{t+1})] \\ &= \frac{a}{b} \sum_{i \leq b} [\nabla f(\mathbf{x}_{t+1}; \xi_{t+1}^i) - \nabla F(\mathbf{x}_{t+1})] + (1-a)(\mathbf{d}_t - \nabla F(\mathbf{x}_t)) \\ &\quad + \frac{1-a}{b} \sum_{i \leq b} [\nabla F(\mathbf{x}_t) - \nabla f(\mathbf{x}_t; \xi_{t+1}^i) - \nabla F(\mathbf{x}_{t+1}) + \nabla f(\mathbf{x}_{t+1}; \xi_{t+1}^i)] \\ &= \frac{a}{b} \sum_{i \leq b} [\nabla f(\mathbf{x}_{t+1}; \xi_{t+1}^i) - \nabla F(\mathbf{x}_{t+1})] + (1-a)\epsilon_t \\ &\quad + \frac{1-a}{b} \sum_{i \leq b} [\nabla F(\mathbf{x}_t) - \nabla f(\mathbf{x}_t; \xi_{t+1}^i) - \nabla F(\mathbf{x}_{t+1}) + \nabla f(\mathbf{x}_{t+1}; \xi_{t+1}^i)], \end{aligned}$$

460 where the last equation is by definition  $\epsilon_t := \mathbf{d}_t - \nabla F(\mathbf{x}_t)$ . Thus we have

$$\begin{aligned} &\frac{\epsilon_{t+1}}{(1-a)^{t+1}} - \frac{\epsilon_t}{(1-a)^t} \\ &= \frac{1}{(1-a)^{t+1}} \left( \frac{a}{b} \sum_{i \leq b} [\nabla f(\mathbf{x}_{t+1}; \xi_{t+1}^i) - \nabla F(\mathbf{x}_{t+1})] \right. \\ &\quad \left. + \frac{1-a}{b} \sum_{i \leq b} [\nabla F(\mathbf{x}_t) - \nabla f(\mathbf{x}_t; \xi_{t+1}^i) - \nabla F(\mathbf{x}_{t+1}) + \nabla f(\mathbf{x}_{t+1}; \xi_{t+1}^i)] \right), \\ &= \frac{1}{(1-a)^{t+1}} \sum_{i \leq b} \epsilon_{t,i}. \end{aligned}$$

461 □

### 462 **B.1 Proof of Lemma A.1**

463 **Proposition B.2.** For two positive sequences  $\{a_i\}_{i=1}^n$  and  $\{b_i\}_{i=1}^n$ . Suppose  $C =$   
 464  $\max_{i,j \in [n]} \{|a_i/a_j|\}$ ,  $\bar{b} = \sum_{i=1}^n b_i/n$ . Then we have,

$$\sum_{i=1}^n a_i b_i \leq \max_i a_i \cdot n \cdot \bar{b} \leq C \sum_{i=1}^n a_i \bar{b}.$$

465 *Proof of Lemma A.1.* By Proposition B.1 we have

$$\frac{\epsilon_{t+1}}{(1-a)^{t+1}} - \frac{\epsilon_t}{(1-a)^t} = \frac{1}{(1-a)^{t+1}} \sum_{i \leq b} \epsilon_{t,i}.$$

466 It is easy to verify that  $\{\epsilon_{t,i}\}$  forms a martingale difference sequence and

$$\begin{aligned}\|\epsilon_{t,i}\|_2^2 &\leq 2\left\|\frac{a}{b}[\nabla f(\mathbf{x}_{t+1}; \xi_{t+1}^i) - \nabla F(\mathbf{x}_{t+1})]\right\|_2^2 \\ &\quad + 2\left\|\frac{1-a}{b}[\nabla F(\mathbf{x}_t) - \nabla f(\mathbf{x}_t; \xi_{t+1}^i) - \nabla F(\mathbf{x}_{t+1}) + \nabla f(\mathbf{x}_{t+1}; \xi_{t+1}^i)]\right\|_2^2 \\ &\leq \frac{2a^2\sigma^2 + 8(1-a)^2L^2\|\mathbf{x}_{t+1} - \mathbf{x}_i\|_2^2}{b^2},\end{aligned}$$

467 where the first inequality holds due to triangle inequality, the second inequality holds due to As-  
468 sumptions 3.1 and 3.2. Therefore, by Azuma-Hoeffding inequality (See Lemma D.1 for detail), with  
469 probability at least  $1 - \delta$ , we have that for any  $t > 0$ ,

$$\begin{aligned}\left\|\frac{\epsilon_t}{(1-a)^t} - \frac{\epsilon_0}{(1-a)^0}\right\|_2^2 &\leq 4\log(4/\delta) \sum_{i=0}^{t-1} b \cdot \frac{2a^2\sigma^2 + 8(1-a)^2L^2\|\mathbf{x}_{i+1} - \mathbf{x}_i\|_2^2}{(1-a)^{2i+2}b^2} \\ &= 8\log(4/\delta) \sum_{i=0}^{t-1} \frac{a^2\sigma^2 + 4(1-a)^2L^2\|\mathbf{x}_{i+1} - \mathbf{x}_i\|_2^2}{(1-a)^{2i+2}b}.\end{aligned}$$

470 Therefore, we have

$$\begin{aligned}\|\epsilon_t\|_2^2 &\leq 2(1-a)^{2t} \left\|\frac{\epsilon_t}{(1-a)^t} - \epsilon_0\right\|_2^2 + 2(1-a)^{2t} \|\epsilon_0\|_2^2 \\ &\leq \log(4/\delta) \left[ \frac{64L^2}{b} \sum_{i=0}^{t-1} (1-a)^{2t-2i} \|\mathbf{x}_{i+1} - \mathbf{x}_i\|_2^2 + \frac{16a\sigma^2}{b} \right] + 2(1-a)^{2t} \|\epsilon_0\|_2^2.\end{aligned}\quad (\text{B.1})$$

471 By Azuma-Hoeffding Inequality, we have with probability  $1 - \delta$ ,

$$\|\epsilon_0\|_2^2 = \left\|\frac{1}{B} \sum_{1 \leq i \leq B} [\nabla f(\mathbf{x}_0; \xi_0^i) - \nabla F(\mathbf{x}_0)]\right\|_2^2 \leq \frac{4\log(4/\delta)\sigma^2}{B}.$$

472 Therefore, with probability  $1 - 2\delta$ , we have

$$\begin{aligned}\|\epsilon_t\|_2^2 &\leq \log(4/\delta) \left[ \frac{64L^2}{b} \sum_{i=0}^{t-1} (1-a)^{2t-2i-2} \|\mathbf{x}_{i+1} - \mathbf{x}_i\|_2^2 + \frac{16a\sigma^2}{b} + \frac{32(1-a)^{2t}\sigma^2}{B} \right] \\ &= \frac{64L^2\log(4/\delta)}{b} \underbrace{\sum_{i=0}^{t-1} (1-a)^{2t-2i-2} \|\mathbf{x}_{i+1} - \mathbf{x}_i\|_2^2}_I + \frac{16a\sigma^2\log(4/\delta)}{b}\end{aligned}\quad (\text{B.2})$$

$$+ \frac{32(1-a)^{2t}\log(4/\delta)\sigma^2}{B}.\quad (\text{B.3})$$

473 We now bound  $I$ . Denote  $S_1 = \{i \in [t-1] | \exists j, t_j \leq i < m_j\}$ ,  $S_2 = \{i \in [t-1] | \exists j, i = m_j\}$ ,

474  $S_3 = \{i \in [t-1] | \exists j, m_j < i < t_{j+1}\}$ , We can divide  $I$  into three part,

$$\begin{aligned}I &= \underbrace{\sum_{i \in S_1} (1-a)^{2t-2i-2} \|\mathbf{x}_{i+1} - \mathbf{x}_i\|_2^2}_{I_1} + \underbrace{\sum_{i \in S_2} (1-a)^{2t-2i-2} \|\mathbf{x}_{i+1} - \mathbf{x}_i\|_2^2}_{I_2} \\ &\quad + \underbrace{\sum_{i \in S_3} (1-a)^{2t-2i-2} \|\mathbf{x}_{i+1} - \mathbf{x}_i\|_2^2}_{I_3}.\end{aligned}\quad (\text{B.4})$$

475 Because  $\|\mathbf{x}_{i+1} - \mathbf{x}_i\|_2 = \eta_t \|\mathbf{d}_i\|_2 = \eta$ , we can bound  $I_1$  as follows,

$$I_1 = \eta^2 \sum_{i \in S_1} (1-a)^{2t-2i-2} \leq \eta^2 \sum_{i=0}^{\infty} (1-a)^i = \frac{\eta^2}{a}.\quad (\text{B.5})$$

476 Because the perturbation radius is  $r$ , we can bound  $I_2$  as follows,

$$I_2 = \sum_{i \in S_2} (1-a)^{2t-2i-2} \|\mathbf{x}_{i+1} - \mathbf{x}_i\|_2^2 \leq r^2 \sum_{i \in S_2} (1-a)^{2t-2i-2} \leq \frac{r^2}{a}. \quad (\text{B.6})$$

477 To bound  $I_3$ , we have

$$\begin{aligned} I_3 &= \sum_{i \in S_3}^{t-1} (1-a)^{2t-2i-2} \|\mathbf{x}_{i+1} - \mathbf{x}_i\|_2^2 \\ &= \sum_{s=1}^S \sum_{i=m_s+1}^{\min\{t-1, t_{s+1}-1\}} (1-a)^{2t-2i-2} \|\mathbf{x}_{i+1} - \mathbf{x}_i\|_2^2 \\ &\leq \sum_{s=1}^S (1-a)^{-2\ell_{\text{thres}}} \sum_{i=m_s+1}^{\min\{t-1, t_{s+1}-1\}} (1-a)^{2t-2i-2} \bar{D} \\ &= (1-a)^{-2\ell_{\text{thres}}} \sum_{i \in S_3}^{t-1} (1-a)^{2t-2i-2} \bar{D} \\ &\leq \frac{\bar{D}(1-a)^{-2\ell_{\text{thres}}}}{a}, \end{aligned} \quad (\text{B.7})$$

478 where  $S$  satisfies  $m_S < t-1 < t_{S+1}$ . The first inequality holds due to Proposition B.2 with the  
479 fact that the average of  $\|\mathbf{x}_{i+1} - \mathbf{x}_i\|_2^2$  is bounded by  $\bar{D}$ , according to the Pullback scheme, and  
480  $t_{s+1} - m_s < \ell_{\text{thres}}$ , the last one holds trivially. Substituting (B.5), (B.6), (B.7) into (B.4), we have

$$I \leq \frac{\eta^2 + r^2 + (1-a)^{2\ell_{\text{thres}}} \bar{D}}{a}.$$

481 Therefore (B.3) can further be bounded by

$$\|\epsilon_t\|_2^2 \leq \frac{64L^2 \log(4/\delta)}{b} \frac{\eta^2 + r^2 + (1-a)^{2\ell_{\text{thres}}} \bar{D}}{a} + \frac{16a\sigma^2 \log(4/\delta)}{b} + \frac{32(1-a)^{2t} \log(4/\delta) \sigma^2}{B}. \quad (\text{B.8})$$

482 By the selection of  $\eta \leq \sigma/(2bL)$ ,  $r \leq \sigma/(2bL)$  and  $\bar{D} \leq \sigma^2/(4b^2L^2)$ ,  $a = 56^2 \log(4/\delta)/b$ ,  
483  $B = b^2$ ,  $a \leq 1/4\ell_{\text{thres}}$ , it's easy to verify that

$$\frac{64L^2 \log(4/\delta)}{b} \frac{\eta^2 + r^2 + 2\bar{D}}{a} \leq \frac{\sigma^2}{b^2} \quad (\text{B.9})$$

$$(1-a)^{2\ell_{\text{thres}}} \geq 1 - 2a\ell_{\text{thres}} \geq \frac{1}{2} \quad (\text{B.10})$$

$$\frac{16a\sigma^2 \log(4/\delta)}{b} \leq \frac{224^2 \sigma^2 \log(4/\delta)^2}{b^2} \quad (\text{B.11})$$

$$\frac{32 \log(4/\delta) \sigma^2}{B} \leq \frac{32 \log(4/\delta) \sigma^2}{b^2}. \quad (\text{B.12})$$

484 Plugging (B.9) to (B.12) into (B.8) gives,

$$\|\epsilon_t\|_2 \leq \frac{2^{10} \log(4/\delta) \sigma}{b}.$$

485

□

## 486 B.2 Proof of Lemma A.3

487 **Lemma B.3** (Small stuck region). Suppose  $-\gamma = \lambda_{\min}(\nabla^2 F(\mathbf{x}_{m_s})) \leq -\epsilon_H$ . Set  $\ell =$   
488  $2 \log(8\epsilon_H \rho^{-1} r_0^{-1})/(\eta_H \gamma)$ ,  $\eta_H \leq \min\{1/(10L \log(8\epsilon_H L \rho^{-1} r_0^{-1})), 1/(10L \log(\ell))\}$ ,  $a \leq \eta_H \gamma$ ,  
489  $r \leq L \eta_H \epsilon_H / \rho$ . Let  $\{\mathbf{x}_t\}, \{\mathbf{x}'_t\}$  be two coupled sequences by running Pullback-STORM from  
490  $\mathbf{x}_{m_s+1}, \mathbf{x}'_{m_s+1}$  with  $\mathbf{w}_{m_s+1} = \mathbf{x}_{m_s+1} - \mathbf{x}'_{m_s+1} = r_0 \mathbf{e}_1$ , where  $\mathbf{x}_{m_s+1}, \mathbf{x}'_{m_s+1} \in \mathbb{B}_{\mathbf{x}_{m_s}}(r)$ ,

491  $r_0 = \delta r / \sqrt{d}$  and  $\mathbf{e}_1$  denotes the smallest eigenvector direction of Hessian  $\nabla^2 F(\mathbf{x}_{m_s})$ . Moreover, let  
 492 batch size  $b \geq \max\{16 \log(4/\delta) \eta_H^{-2} L^{-2} \gamma^{-2}, 56^2 \log(4/\delta) a^{-1}\}$ , then with probability  $1 - 2\delta$  we  
 493 have

$$\exists T \leq \ell, \max\{\|\mathbf{x}_T - \mathbf{x}_0\|_2, \|\mathbf{x}'_T - \mathbf{x}'_0\|_2\} \geq \frac{\eta_H \epsilon_H L}{\rho}.$$

494 *Proof.* See Appendix C.1. □

495 *Proof of Lemma A.3.* We assume  $\lambda_{\min}(\nabla^2 F(\mathbf{x}_{m_s})) < -\epsilon_H$  and prove our statement by contradic-  
 496 tion. Lemma B.3 shows that, in the random perturbation ball at least one of two points in the  $\mathbf{e}_1$   
 497 direction will escape the saddle point if their distance is larger than  $r_0 = \frac{\delta r}{\sqrt{d}}$ . Thus, the probability  
 498 of the starting point  $\mathbf{x}_{m_s+1} \sim \mathbb{B}_{\mathbf{x}_{m_s}}(r)$  located in the stuck region uniformly is less than  $\delta$ . Then  
 499 with probability at least  $1 - 2\delta$ ,

$$\exists m_s < t < m_s + \ell_{\text{thres}}, \|\mathbf{x}_t - \mathbf{x}_{m_s}\|_2 \geq \frac{L \eta_H \epsilon_H}{\rho}. \quad (\text{B.13})$$

500 Suppose Pullback-STORM does not break, then for any  $m_s < t < m_s + \ell_{\text{thres}}$ ,

$$\|\mathbf{x}_t - \mathbf{x}_{m_s}\|_2 \leq \sum_{i=m_s}^{t-1} \|\mathbf{x}_{i+1} - \mathbf{x}_i\|_2 \leq \sqrt{(t - m_s) \sum_{i=m_s}^{t-1} \|\mathbf{x}_{i+1} - \mathbf{x}_i\|_2^2} \leq (t - m_s) \sqrt{\bar{D}},$$

501 where the first inequality is due to the triangle inequality and the second inequality is due to Cauchy-  
 502 Schwarz inequality. Thus, by the selection of  $\bar{D}$ , we have

$$\|\mathbf{x}_t - \mathbf{x}_{m_s}\|_2 \leq (t - m_s) \sqrt{\bar{D}} \leq \ell_{\text{thres}} \sqrt{\bar{D}} < \frac{L \eta_H \epsilon_H}{\rho},$$

503 which contradicts (B.13). Therefore, we know that with probability at least  $1 - 2\delta$ ,  
 504  $\lambda_{\min}(\nabla^2 F(\mathbf{x}_{m_s})) \geq -\epsilon_H$ . □

### 505 B.3 Proof of Lemma A.4

506 *Proof of Lemma A.4.* Suppose  $m_s < i < t_{s+1}$ . Then with probability at least  $1 - \delta$ , then by Lemma  
 507 D.2 we have

$$\begin{aligned} F(\mathbf{x}_{i+1}) &\leq F(\mathbf{x}_i) + \frac{\eta_i}{2} \|\epsilon_i\|_2^2 - \left( \frac{1}{2\eta_i} - \frac{L}{2} \right) \|\mathbf{x}_{i+1} - \mathbf{x}_i\|_2^2 \\ &\leq F(\mathbf{x}_i) + \frac{\eta_H}{2} \frac{2^{20} \log(4/\delta)^2 \sigma^2}{b^2} - \frac{1}{4\eta_H} \|\mathbf{x}_{i+1} - \mathbf{x}_i\|_2^2 \end{aligned} \quad (\text{B.14})$$

508 where the second inequality holds due to Lemma A.1 and the fact that for any  $m_s < i < t_{s+1}$ ,  
 509  $\eta_i \leq \eta_H \leq 1/(2L)$ . Taking summation of (B.14) from  $i = m_s + 1$  to  $t - 1$ , we have

$$F(\mathbf{x}_t) \leq F(\mathbf{x}_{m_s+1}) + 2^{19} \eta_H \log(4/\delta)^2 (t - m_s - 1) \frac{\sigma^2}{b^2} - \frac{1}{4\eta_H} \sum_{i=m_s+1}^{t-1} \|\mathbf{x}_{i+1} - \mathbf{x}_i\|_2^2. \quad (\text{B.15})$$

510 Finally, we have

$$\begin{aligned} F(\mathbf{x}_{m_s+1}) - F(\mathbf{x}_{t_{s+1}}) &\geq \sum_{i=m_s+1}^{t_{s+1}-1} \frac{\|\mathbf{x}_{i+1} - \mathbf{x}_i\|_2^2}{4\eta_H} - 2^{19} \log(4/\delta)^2 (t - m_s - 1) \eta_H \frac{\sigma^2}{b^2} \\ &= (t_{s+1} - m_s - 1) \left( \frac{\bar{D}}{4\eta_H} - \frac{2^{19} \log(4/\delta)^2 \eta_H \sigma^2}{b^2} \right) \\ &= (t_{s+1} - m_s - 1) \left( \frac{\sigma^2}{16\eta_H b^2 L^2} - \frac{2^{19} \log(4/\delta)^2 \eta_H \sigma^2}{b^2} \right) \\ &\geq (t_{s+1} - m_s - 1) \frac{4 \log(4/\delta)^2 \eta_H \sigma^2}{b^2}, \end{aligned} \quad (\text{B.16})$$

511 where the last inequality is by the selection of  $\eta_H \leq 1/(2^{12}L \log(4/\delta))$ . For  $i = m_s$ , by Lemma  
 512 **D.2** we have

$$\begin{aligned} F(\mathbf{x}_{m_s+1}) &\leq F(\mathbf{x}_t) + (2\|\mathbf{d}_t\|_2 + 2\|\boldsymbol{\epsilon}_t\|_2 + Lr/2)r \\ &\leq F(\mathbf{x}_{m_s}) + (4\epsilon + Lr/2)r \\ &\leq F(\mathbf{x}_{m_s}) + \frac{2\log(4/\delta)^2\eta_H\sigma^2}{b^2}, \end{aligned} \quad (\text{B.17})$$

513 where the last inequality is by the selection,  $r \leq \min \{ \log(4/\delta)^2\eta_H\sigma^2/(4b^2\epsilon), \sqrt{2\log(4/\delta)^2\eta_H\sigma^2/(b^2L)} \}$ .

514 Combining (B.16) and (B.17) we have that

$$\begin{aligned} F(\mathbf{x}_{m_s}) - F(\mathbf{x}_{t_{s+1}}) &= F(\mathbf{x}_{m_s}) - F(\mathbf{x}_{m_s+1}) + F(\mathbf{x}_{m_s+1}) - F(\mathbf{x}_{t_{s+1}}) \\ &\geq (t_{s+1} - m_s - 1) \frac{4\log(4/\delta)^2\eta_H\sigma^2}{b^2} - \frac{2\log(4/\delta)^2\eta_H\sigma^2}{b^2} \\ &\geq (t_{s+1} - m_s) \frac{\log(4/\delta)^2\eta_H\sigma^2}{b^2}, \end{aligned}$$

515 where we use the fact that  $t_{s+1} - m_s \geq 2$ . □

## 516 **C Proof of Lemmas in Section B**

### 517 **C.1 Proof of Lemma B.3**

518 Define  $\mathbf{w}_t := \mathbf{x}_t - \mathbf{x}'_t$  as the distance between the two coupled sequences. By the construction, we  
 519 have that  $\mathbf{w}_0 = r_0\mathbf{e}_1$ , where  $\mathbf{e}_1$  is the smallest eigenvector direction of Hessian  $\mathcal{H} := \nabla^2 F(\mathbf{x}_{m_s})$ .

$$\begin{aligned} \mathbf{w}_t &= \mathbf{w}_{t-1} - \eta(\mathbf{d}_{t-1} - \mathbf{d}'_{t-1}) \\ &= \mathbf{w}_{t-1} - \eta(\nabla F(\mathbf{x}_{t-1}) - \nabla F(\mathbf{x}'_{t-1}) + \mathbf{d}_{t-1} - F(\mathbf{x}_{t-1}) - \mathbf{d}'_{t-1} + \nabla F(\mathbf{x}'_{t-1})) \\ &= \mathbf{w}_{t-1} - \eta \left[ (\mathbf{x}_{t-1} - \mathbf{x}'_{t-1}) \int_0^1 \nabla^2 F(\mathbf{x}'_{t-1} + \theta(\mathbf{x}_{t-1} - \mathbf{x}'_{t-1})) d\theta \right. \\ &\quad \left. + \mathbf{d}_{t-1} - F(\mathbf{x}_{t-1}) - \mathbf{d}'_{t-1} + F(\mathbf{x}'_{t-1}) \right] \\ &= (1 - \eta\mathcal{H})\mathbf{w}_{t-1} - \eta(\Delta_{t-1}\mathbf{w}_{t-1} + \mathbf{y}_{t-1}), \end{aligned}$$

520 where

$$\begin{aligned} \Delta_{t-1} &:= \int_0^1 (\nabla^2 F(\mathbf{x}'_{t-1} + \theta(\mathbf{x}_{t-1} - \mathbf{x}'_{t-1})) - \mathcal{H}) d\theta, \\ \mathbf{y}_{t-1} &:= \mathbf{d}_{t-1} - \nabla F(\mathbf{x}_{t-1}) - \mathbf{d}'_{t-1} + \nabla F(\mathbf{x}'_{t-1}) = \boldsymbol{\epsilon}_{t-1} - \boldsymbol{\epsilon}'_{t-1}. \end{aligned}$$

521 Recursively applying the above equation, we get

$$\mathbf{w}_t = (1 - \eta\mathcal{H})^{t-m_s-1}\mathbf{w}_{m_s+1} - \eta \sum_{\tau=m_s+1}^{t-1} (1 - \eta\mathcal{H})^{t-1-\tau} (\Delta_\tau\mathbf{w}_\tau + \mathbf{y}_\tau). \quad (\text{C.1})$$

522 We want to show that the first term of (C.1) dominates the second term. Next Lemma is essential for  
 523 the proof of Lemma B.3, which bounds the norm of  $\mathbf{y}_t$ .

524 **Lemma C.1.** Under Assumption 3.1, we have following inequality holds,

$$\begin{aligned} \|\mathbf{y}_t\|_2 &\leq 2\sqrt{\log(4/\delta)}b^{-1/2}a^{-1/2} \left( 2L \max_{m_s < \tau < t} \|\mathbf{w}_{\tau+1} - \mathbf{w}_\tau\|_2 \right. \\ &\quad \left. + \max_{m_s < \tau \leq t} (2aL + 4\rho D_\tau) \cdot \max_{m_s < \tau \leq t} \|\mathbf{w}_\tau\|_2 \right) + 4\sqrt{\log(4/\delta)}b^{-1/2}Lr_0, \end{aligned} \quad (\text{C.2})$$

525 where  $D_\tau = \max\{\|\mathbf{x}_\tau - \mathbf{x}_{m_s}\|_2, \|\mathbf{x}'_\tau - \mathbf{x}_{m_s}\|_2\}$ .

526 *Proof of Lemma C.1.* By Proposition B.1, we have that

$$\frac{\mathbf{y}_{t+1}}{(1-a)^{t+1}} - \frac{\mathbf{y}_t}{(1-a)^t} = \frac{\boldsymbol{\epsilon}_{t+1}}{(1-a)^{t+1}} - \frac{\boldsymbol{\epsilon}_t}{(1-a)^t} - \frac{\boldsymbol{\epsilon}'_{t+1}}{(1-a)^{t+1}} + \frac{\boldsymbol{\epsilon}'_t}{(1-a)^t}$$

$$= \frac{1}{(1-a)^{t+1}} \sum_{i \leq b} [\epsilon_{t,i} - \epsilon'_{t,i}],$$

527 where  $\epsilon_{t,i}$  is the same as that in Proposition B.1:

$$\begin{aligned} \epsilon_{t,i} &= \frac{a}{b} [\nabla f(\mathbf{x}_{t+1}; \xi_{t+1}^i) - \nabla F(\mathbf{x}_{t+1})] \\ &\quad + \frac{1-a}{b} [\nabla F(\mathbf{x}_t) - \nabla f(\mathbf{x}_t; \xi_{t+1}^i) - \nabla F(\mathbf{x}_{t+1}) + \nabla f(\mathbf{x}_{t+1}; \xi_{t+1}^i)] \\ &= \frac{1}{b} [\nabla f(\mathbf{x}_{t+1}; \xi_{t+1}^i) - \nabla F(\mathbf{x}_{t+1})] + \frac{1-a}{b} [\nabla F(\mathbf{x}_t) - \nabla f(\mathbf{x}_t; \xi_{t+1}^i)], \end{aligned} \quad (\text{C.3})$$

528 where we rewrite  $\epsilon_{t,i}$  as (C.3) because now we want bound the  $\epsilon_t - \epsilon'_t$  by the distance between two  
529 sequence.  $\epsilon'_{t,i}$  is defined similarly as follows

$$\epsilon'_{t,i} = \frac{1}{b} [\nabla f(\mathbf{x}_{t+1}; \xi_{t+1}^i) - \nabla F(\mathbf{x}_{t+1})] + \frac{1-a}{b} [\nabla F(\mathbf{x}_t) - \nabla f(\mathbf{x}_t; \xi_{t+1}^i)].$$

530 It is easy to verify that  $\{\epsilon_{t,i} - \epsilon'_{t,i}\}$  forms a martingale difference sequence. We now bound  
531  $\|\epsilon_{t,i} - \epsilon'_{t,i}\|_2^2$ . Denote  $\mathcal{H}_{t+1,i} = \nabla^2 f(\mathbf{x}_{m_s}; \xi_{t+1}^i)$ , then we introduce two terms

$$\begin{aligned} \Delta_{t+1,i} &:= \int_0^1 (\nabla^2 f(\mathbf{x}'_{t+1} + \theta(\mathbf{x}_{t+1} - \mathbf{x}'_{t+1}); \xi_{t+1}^i) - \mathcal{H}_{t+1,i}) d\theta \\ \widehat{\Delta}_{t+1,i} &:= \int_0^1 (\nabla^2 f(\mathbf{x}'_t + \theta(\mathbf{x}_t - \mathbf{x}'_t); \xi_{t+1}^i) - \mathcal{H}_{t+1,i}) d\theta, \end{aligned}$$

532 By Assumption 3.1, we have  $\|\Delta_{t+1,i}\|_2 \leq \rho \max_{\theta \in [0,1]} \|\mathbf{x}'_{t+1} + \theta(\mathbf{x}_{t+1} - \mathbf{x}'_{t+1}) - \mathbf{x}_{m_s+1}\|_2 \leq$   
533  $\rho D_{t+1}$ , similarly we have  $\|\widehat{\Delta}_{t+1,i}\|_2 \leq \rho D_t$  and  $\Delta_{t+1} \leq \rho D_{t+1}$ .

534 Now we bound  $\epsilon_{t,i} - \epsilon'_{t,i}$ ,

$$\begin{aligned} b(\epsilon_{t,i} - \epsilon'_{t,i}) &= \left( [\nabla f(\mathbf{x}_{t+1}; \xi_{t+1}^i) - \nabla F(\mathbf{x}_{t+1})] + (1-a)[\nabla F(\mathbf{x}_t) - \nabla f(\mathbf{x}_t; \xi_{t+1}^i)] \right) \\ &\quad - \left( [\nabla f(\mathbf{x}'_{t+1}; \xi_{t+1}^i) - \nabla F(\mathbf{x}'_{t+1})] - (1-a)[\nabla F(\mathbf{x}'_t) - \nabla f(\mathbf{x}'_t; \xi_{t+1}^i)] \right) \\ &= (\mathcal{H}_{t+1,i} \mathbf{w}_{t+1} + \Delta_{t+1,i} \mathbf{w}_{t+1} - \mathcal{H} \mathbf{w}_{t+1} - \Delta_{t+1} \mathbf{w}_{t+1} + (1-a) \mathcal{H} \mathbf{w}_t \\ &\quad + (1-a) \Delta_t \mathbf{w}_t - (1-a) \mathcal{H}_{t+1,i} \mathbf{w}_t - (1-a) \widehat{\Delta}_{t+1,i} \mathbf{w}_t) \\ &= (\mathcal{H}_{t+1,i} - \mathcal{H})(\mathbf{w}_{t+1} - (1-a) \mathbf{w}_t) + (\Delta_{t+1,i} - \Delta_{t+1}) \mathbf{w}_{t+1} \\ &\quad + (1-a)(\Delta_t - \widehat{\Delta}_{t+1,i}) \mathbf{w}_t. \end{aligned} \quad (\text{C.4})$$

535 This implies the LHS of (C.4) has the following bound.

$$\begin{aligned} \|b(\epsilon_{t,i} - \epsilon'_{t,i})\|_2 &\leq 2L \|\mathbf{w}_{t+1} - (1-a) \mathbf{w}_t\|_2 + 2\rho D_{t+1}^x \|\mathbf{w}_{t+1}\|_2 + 2\rho D_t^x \|\mathbf{w}_t\|_2 \\ &\leq 2L \|\mathbf{w}_{t+1} - \mathbf{w}_t\|_2 + 2\rho D_{t+1}^x \|\mathbf{w}_{t+1}\|_2 + (2aL + 2\rho D_t^x) \|\mathbf{w}_t\|_2 \\ &\leq 2L \underbrace{\max_{m_s < \tau < t} \|\mathbf{w}_{\tau+1} - \mathbf{w}_\tau\|_2 + \max_{m_s < \tau \leq t} (2aL + 4\rho D_\tau) \cdot \max_{m_s < \tau \leq t} \|\mathbf{w}_\tau\|_2}_M \end{aligned}$$

536 where the first inequality is by the gradient Lipschitz Assumption and Hessian Lipschitz Assump-  
537 tion 3.1, the second inequality is by triangle inequality. Therefore we have

$$\|\epsilon_{t,i} - \epsilon'_{t,i}\|_2^2 \leq \frac{M^2}{b^2}$$

538 Furthermore, by Azuma Hoeffding inequality (See Lemma D.1 for detail), with probability at least  
539  $1 - \delta$ , we have that for any  $t > 0$ ,

$$\left\| \frac{\mathbf{y}_t}{(1-a)^t} - \frac{\mathbf{y}_{m_s+1}}{(1-a)^{m_s+1}} \right\|_2^2 = \left\| \sum_{\tau=m_s+1}^{t-1} \left( \frac{\mathbf{y}_{\tau+1}}{(1-a)^{\tau+1}} - \frac{\mathbf{y}_\tau}{(1-a)^\tau} \right) \right\|_2^2$$

$$\begin{aligned}
&= \left\| \sum_{\tau=m_s+1}^{t-1} \left( \frac{1}{(1-a)^{\tau+1}} \sum_{i \leq b} [\epsilon_{\tau,i} - \epsilon'_{\tau,i}] \right) \right\|_2^2 \\
&\leq 4 \log(4/\delta) \left( \sum_{i=m_s+1}^{t-1} b \cdot \frac{M^2}{(1-a)^{2\tau+2}b^2} \right).
\end{aligned}$$

540 Multiply  $(1-a)^{2t}$  on both side, we get

$$\begin{aligned}
\|y_t - (1-a)^{t-m_s-1} y_{m_s+1}\|_2^2 &\leq 4b^{-1} \log(4/\delta) \sum_{\tau=m_s+1}^{t-1} (1-a)^{2t-2\tau-2} M^2 \\
&\leq 4 \log(4/\delta) b^{-1} a^{-1} M^2,
\end{aligned}$$

541 where the last inequality is by  $\sum_{i=0}^{t-1} (1-a)^{2t-2i-2} \leq a^{-1}$ . Furthermore, by triangle inequality we  
542 have

$$\|y_t\|_2 \leq 2\sqrt{\log(4/\delta)} b^{-1/2} a^{-1/2} M + (1-a)^{t-m_s-1} \|y_{m_s+1}\|_2. \quad (\text{C.5})$$

543  $\|\nabla f(\mathbf{x}_{m_s+1}; \xi_{m_s+1}^i) - \nabla F(\mathbf{x}'_{m_s+1}) - \nabla f(\mathbf{x}'_{m_s+1}; \xi_{m_s+1}^i) + \nabla F(\mathbf{x}'_{m_s+1})\|_2 \leq 2Lr_0$  due to As-  
544 sumption 3.1. Then by Azuma Inequality(See Lemma D.1), we have with probability at least  
545  $1 - \delta$ ,

$$\begin{aligned}
\|y_{m_s+1}\|_2^2 &= \|\mathbf{d}_{m_s+1} - \nabla F(\mathbf{x}_{m_s+1}) - \mathbf{d}'_{m_s+1} + \nabla F(\mathbf{x}'_{m_s+1})\|_2^2 \\
&= \left\| \frac{1}{b} \sum_{i \leq b} [\nabla f(\mathbf{x}_{m_s+1}; \xi_{m_s+1}^i) - \nabla F(\mathbf{x}'_{m_s+1}) - \nabla f(\mathbf{x}'_{m_s+1}; \xi_{m_s+1}^i) + \nabla F(\mathbf{x}'_{m_s+1})] \right\|_2^2 \\
&\leq \frac{4 \log(4/\delta) 4L^2 r_0^2}{b}. \quad (\text{C.6})
\end{aligned}$$

546 Plugging (C.6) into (C.5) gives

$$\begin{aligned}
\|y_t\|_2 &\leq 2\sqrt{\log(4/\delta)} b^{-1/2} a^{-1/2} \left( 2L \max_{m_s < \tau < t} \|\mathbf{w}_{\tau+1} - \mathbf{w}_{\tau}\|_2 \right. \\
&\quad \left. + \max_{m_s < \tau \leq t} (2aL + 4\rho D_{\tau}) \cdot \max_{m_s < \tau \leq t} \|\mathbf{w}_{\tau}\|_2 \right) + 4\sqrt{\log(4/\delta)} b^{-1/2} Lr_0.
\end{aligned}$$

547 □

548 Now we can give a proof of Lemma B.3.

549 *Proof of Lemma B.3.* We proof it by induction that

- 550 1.  $\frac{1}{2}(1 + \eta_H \gamma)^{t-m_s-1} r_0 \leq \|\mathbf{w}_t\|_2 \leq \frac{3}{2}(1 + \eta_H \gamma)^{t-m_s-1} r_0$ .
- 551 2.  $\|y_t\|_2 \leq 2\eta_H \gamma L(1 + \eta_H \gamma)^{t-m_s-1} r_0$ .

552 First for  $t = m_s + 1$ , we have  $\|\mathbf{w}_{m_s+1}\|_2 = r_0$ ,  $\|y_{m_s+1}\|_2 \leq \sqrt{16b^{-1} \log(4/\delta) L^2 r_0^2} \leq$   
553  $2\eta_H \gamma Lr_0$  (See (C.6)), where  $b \geq 2\eta_H^{-2} \gamma^{-2} \sqrt{\log(4/\delta)}$ . Assume they hold for all  $m_s < \tau < t$ ,  
554 we now prove they hold for t. We bound  $\mathbf{w}_t$  first, we only need to show that second term of (C.1) is  
555 bounded by  $\frac{1}{2}(1 + \eta_H \gamma)^t r_0$ .

$$\begin{aligned}
&\left\| \eta_H \sum_{\tau=m_s+1}^{t-1} (1 - \eta_H \mathcal{H})^{t-1-\tau} (\Delta_{\tau} \mathbf{w}_{\tau} + \mathbf{y}_{\tau}) \right\|_2 \\
&\leq \eta_H \sum_{\tau=m_s+1}^{t-1} (1 + \eta_H \gamma)^{t-1-\tau} (\|\Delta_{\tau}\|_2 \|\mathbf{w}_{\tau}\|_2 + \|\mathbf{y}_{\tau}\|_2)
\end{aligned}$$



$$\begin{aligned}
&\leq \eta_H \sum_{\tau=m_s+1}^{t-1} (1 + \eta_H \gamma)^{t-m_s-2} r_0 \left( \frac{3}{2} \|\Delta_\tau\|_2 + 2\eta_H \gamma L \right) \\
&\leq \eta_H \sum_{\tau=m_s+1}^{t-1} (1 + \eta_H \gamma)^{t-m_s-2} r_0 (3\eta_H \epsilon_H L + 2\eta_H \gamma L) \\
&= \eta_H \ell (1 + \eta_H \gamma)^{t-m_s-2} r_0 \cdot 5\eta_H \gamma L \\
&\leq 10 \log(8\epsilon_H \rho^{-1} r_0^{-1}) \eta_H L (1 + \eta_H \gamma)^{t-m_s-2} r_0 \\
&\leq \frac{1}{2} (1 + \eta_H \gamma)^{t-m_s-1} r_0,
\end{aligned}$$

556 where the first inequality is by the eigenvalue assumption over  $\mathcal{H}$ , the second inequality is by the  
557 Induction hypothesis, the third inequality is by  $\|\Delta_\tau\|_2 \leq \rho D_\tau = \rho \max\{\|\mathbf{x}_\tau - \mathbf{x}_{m_s}\|_2, \|\mathbf{x}'_\tau - \mathbf{x}_{m_s}\|_2\} \leq \eta_H \epsilon_H L + r\rho \leq 2\eta_H \epsilon_H L$ , the fourth inequality is by the choice of  $t - m_s - 1 \leq \ell \leq$   
558  $2 \log(8\epsilon_H \rho^{-1} r_0^{-1}) / (\eta_H \gamma)$ , the last inequality is by the choice of  $\eta_H \leq 1 / (10 \log(8\epsilon_H \rho^{-1} r_0^{-1}) L)$ .  
559 Now we bound  $\|\mathbf{y}_t\|_2$  by (C.2). We first get the bound for  $L\|\mathbf{w}_{i+1} - \mathbf{w}_i\|_2$  as follows,

$$\begin{aligned}
&L\|\mathbf{w}_{t+1} - \mathbf{w}_t\|_2 \\
&= L \left\| -\eta_H \mathcal{H}(I - \eta_H \mathcal{H})^{t-m_s-2} \mathbf{w}_0 - \eta_H \sum_{\tau=m_s+1}^{t-2} \eta_H \mathcal{H}(I - \eta_H \mathcal{H})^{t-2-\tau} (\Delta_\tau \mathbf{w}_\tau + \mathbf{y}_\tau) \right. \\
&\quad \left. + \eta_H (\Delta_{t-1} \mathbf{w}_{t-1} + \mathbf{y}_{t-1}) \right\|_2 \\
&\stackrel{(i)}{\leq} L\eta_H \gamma (1 + \eta_H \gamma)^{t-m_s-2} r_0 + L\eta_H \left\| \sum_{\tau=m_s+1}^{t-2} \eta_H \mathcal{H}(I - \eta_H \mathcal{H})^{t-2-\tau} (\Delta_\tau \mathbf{w}_\tau + \mathbf{y}_\tau) \right\|_2 \\
&\quad + L\eta_H \left\| \Delta_{t-1} \mathbf{w}_{t-1} + \mathbf{y}_{t-1} \right\|_2 \\
&\stackrel{(ii)}{\leq} L\eta_H \gamma (1 + \eta_H \gamma)^{t-m_s-2} r_0 \\
&\quad + L\eta_H \left[ \left\| \sum_{\tau=m_s+1}^{t-2} \eta_H \mathcal{H}(I - \eta_H \mathcal{H})^{t-2-\tau} \right\|_2 + 1 \right] \max_{0 \leq \tau \leq t-1} \left\| \Delta_\tau \mathbf{w}_\tau + \mathbf{y}_\tau \right\|_2 \\
&\stackrel{(iii)}{\leq} L\eta_H \gamma (1 + \eta_H \gamma)^{t-m_s-2} r_0 + L\eta_H \left[ \sum_{\tau=m_s+1}^{t-2} \frac{1}{t-1-\tau} + 1 \right] \max_{0 \leq \tau \leq t-1} \left\| \Delta_\tau \mathbf{w}_\tau + \mathbf{y}_\tau \right\|_2 \\
&\stackrel{(iv)}{\leq} L\eta_H \gamma (1 + \eta_H \gamma)^{t-m_s-2} r_0 + L\eta_H [\log(t - m_s - 1) + 1] \cdot [5\eta_H \gamma L (1 + \eta_H \gamma)^{t-m_s-2} r_0] \\
&\stackrel{(v)}{\leq} 6L\eta_H \gamma (1 + \eta_H \gamma)^{t-m_s-2} r_0 + 5 \log(t - m_s - 1) \gamma \eta_H^2 L^2 (1 + \eta_H \gamma)^{t-m_s-2} r_0, \tag{C.7}
\end{aligned}$$

561 where (i) is by triangle inequality, (ii) is by the definition of max, (iii) is by  $\|\eta_H \mathcal{H}(I -$   
562  $\eta_H \mathcal{H})^{t-2-\tau}\|_2 \leq \frac{1}{t-1-\tau}$ , (iv) is due to  $\|\Delta_\tau\|_2 \leq \rho D_\tau \leq \rho(\eta_H \gamma L / \rho + r) \leq 2\gamma \eta_H L$ ,  $\|\mathbf{w}_\tau\|_2 \leq$   
563  $3(1 + \eta_H \gamma)^{\tau-m_s-1} r_0 / 2$  and  $\|\mathbf{y}_\tau\|_2 \leq 2\eta_H \gamma L (1 + \eta_H \gamma)^{\tau-m_s-1} r_0$ , (v) is due to  $\eta_H \leq 1/L$ .

564 We next get the bound of  $\max_{m_s < \tau \leq t} (2aL + 4\rho D_\tau) \cdot \max_{m_s < \tau \leq t} \|\mathbf{w}_\tau\|_2$  as follows

$$\begin{aligned}
\max_{m_s < \tau \leq t} (2aL + 4\rho D_\tau) \cdot \max_{m_s < \tau \leq t} \|\mathbf{w}_\tau\|_2 &\leq (2aL + 8\gamma \eta_H L) \frac{3(1 + \eta_H \gamma)^{t-m_s-1}}{2} r_0 \\
&\leq 15\gamma \eta_H L (1 + \eta_H \gamma)^{t-m_s-1} r_0. \tag{C.8}
\end{aligned}$$

565 where the first inequality is by  $\rho D_t \leq \rho(\gamma \eta_H L / \rho + r) \leq 2\gamma \eta_H L$  and the induction hypothesis, last  
566 inequality is by  $a \leq \gamma \eta_H$ .

567 Plugging (C.7) and (C.8) into (C.2) gives,

$$\|\mathbf{y}_t\|_2 \leq 2\sqrt{\log(4/\delta)} b^{-1/2} a^{-1/2} \left( 2L \max_{m_s < \tau < t} \|\mathbf{w}_{\tau+1} - \mathbf{w}_\tau\|_2 \right)$$

$$\begin{aligned}
& + \max_{m_s < \tau \leq t} (2aL + 4\rho D_\tau) \cdot \max_{m_s < \tau \leq t} \|\mathbf{w}_\tau\|_2 \Big) + 4\sqrt{\log(4/\delta)}b^{-1/2}Lr_0 \\
& \leq 2\sqrt{\log(4/\delta)}b^{-1/2}a^{-1/2} \Big( 10\log(\ell)\gamma\eta_H^2L^2(1 + \eta_H\gamma)^{t-m_s-1}r_0 \\
& \quad + 27\gamma\eta_HL(1 + \eta_H\gamma)^{t-m_s-1}r_0 \Big) + 4\sqrt{\log(4/\delta)}b^{-1/2}Lr_0 \\
& \leq \underbrace{56\sqrt{\log(4/\delta)}b^{-1/2}a^{-1/2}\eta_HL\gamma(1 + \eta_H\gamma)^{t-m_s-1}r_0}_{I_1} \\
& \quad + \underbrace{4\sqrt{\log(4/\delta)}b^{-1/2}(1 + \eta_H\gamma)^{t-m_s-1}r_0}_{I_2}
\end{aligned}$$

568 where the last inequality is by  $\eta_H \leq 1/(10L\log \ell)$ . Now we bound  $I_1$  and  $I_2$  respectively.

$$\begin{aligned}
I_1 & = 56\sqrt{\log(4/\delta)}b^{-1/2}a^{-1/2}\eta_HL\gamma(1 + \eta_H\gamma)^{t-m_s-1}r_0 \\
& = \eta_H\gamma L(1 + \eta_H\gamma)^{t-m_s-1}r_0,
\end{aligned}$$

569 where the inequality is applying  $b \geq 56^2\log(4/\delta)a^{-1}$ . Now we bound  $I_2$  by applying  $b \geq$   
570  $16\log(4/\delta)\eta_H^{-2}L^{-2}\gamma^{-2}$ ,

$$I_2 \leq \eta_H\gamma L(1 + \eta_H\gamma)^{t-m_s-1}r_0.$$

571 Then we obtain that

$$\|\mathbf{y}_t\|_2 \leq 2\eta_H\gamma L(1 + \eta_H\gamma)^{t-m_s-1}r_0,$$

572 which finishes the induction. So we have  $\|\mathbf{w}_t\|_2 \geq \frac{1}{2}(1 + \eta_H\gamma)^{t-m_s-1}r_0$ . However, the triangle  
573 inequality give the bound

$$\begin{aligned}
\|\mathbf{w}_t\|_2 & \leq \|\mathbf{x}_t - \mathbf{x}_{m_s+1}\|_2 + \|\mathbf{x}_{m_s+1} - \mathbf{x}_{m_s}\|_2 + \|\mathbf{x}'_t - \mathbf{x}'_{m_s+1}\|_2 + \|\mathbf{x}'_{m_s+1} - \mathbf{x}'_{m_s}\|_2 \\
& \leq 2r + 2\frac{\epsilon_H\eta_HL}{\rho} \\
& \leq 4\frac{\epsilon_H\eta_HL}{\rho},
\end{aligned}$$

574 where the last inequality is due to  $r \leq \epsilon_H\eta_HL/\rho$ . So we obtain that

$$t \leq \frac{\log(8\epsilon_H\eta_HL\rho^{-1}r_0^{-1})}{\log(1 + \eta_H\gamma)} < \frac{2\log(8\epsilon_H\rho^{-1}r_0^{-1})}{\eta_H\gamma}.$$

575

□

## 576 D Auxiliary Lemmas

577 We start by providing the Azuma–Hoeffding inequality under the vector settings.

578 **Lemma D.1** (Theorem 3.5, Pinelis [24]). Let  $\epsilon_{1:k} \in \mathbb{R}^d$  be a vector-valued martingale difference  
579 sequence with respect to  $\mathcal{F}_k$ , i.e., for each  $k \in [K]$ ,  $\mathbb{E}[\epsilon_k|\mathcal{F}_k] = 0$  and  $\|\epsilon_k\|_2 \leq B_k$ , then we have  
580 given  $\delta \in (0, 1)$ , w.p.  $1 - \delta$ ,

$$\left\| \sum_{i=1}^K \epsilon_k \right\|_2^2 \leq 4\log(4/\delta) \sum_{i=1}^K B_k^2.$$

581 This lemma provides a dimension-free bound due to the fact that the Euclidean norm version of  $\mathbb{R}^d$   
582 is  $(2, 1)$  smooth, see also Kallenberg and Sztencel [15], Fang et al. [9]. Now, we are give a proof of  
583 Lemma 6.1.

584 We have the following lemma:

585 **Lemma D.2.** For any  $t \neq m_s$ , we have

$$F(\mathbf{x}_{t+1}) \leq F(\mathbf{x}_t) - \frac{\eta_t}{2}\|\mathbf{d}_t\|_2^2 + \frac{\eta_t}{2}\|\epsilon_t\|_2^2 + \frac{L}{2}\|\mathbf{x}_{t+1} - \mathbf{x}_t\|_2^2.$$

586 For  $t = m_s$ , we have  $F(\mathbf{x}_{t+1}) \leq F(\mathbf{x}_t) + (\|\mathbf{d}_t\|_2 + \|\epsilon_t\|_2 + Lr/2)r$ .

587 *Proof of Lemma D.2.* By Assumption 3.1, we have

$$F(\mathbf{x}_{t+1}) \leq F(\mathbf{x}_t) + \langle \nabla F(\mathbf{x}_t), \mathbf{x}_{t+1} - \mathbf{x}_t \rangle + \frac{L}{2} \|\mathbf{x}_{t+1} - \mathbf{x}_t\|_2^2. \quad (\text{D.1})$$

588 For the case  $t \neq m_s$ , the update rule is  $\mathbf{x}_{t+1} = \mathbf{x}_t - \eta_t \mathbf{d}_t$ , therefore

$$\begin{aligned} F(\mathbf{x}_{t+1}) &\leq F(\mathbf{x}_t) - \eta_t \langle \nabla F(\mathbf{x}_t), \mathbf{d}_t \rangle + \frac{L}{2} \|\mathbf{x}_{t+1} - \mathbf{x}_t\|_2^2 \\ &= F(\mathbf{x}_t) - \eta_t \|\nabla F(\mathbf{x}_t)\|_2^2 / 2 - \eta_t \|\mathbf{d}_t\|_2^2 / 2 + \eta_t \|\epsilon_t\|_2^2 / 2 + L \|\mathbf{x}_{t+1} - \mathbf{x}_t\|_2^2 / 2 \\ &\leq F(\mathbf{x}_t) - \eta_t \|\mathbf{d}_t\|_2^2 / 2 + \eta_t \|\epsilon_t\|_2^2 / 2 + \frac{L}{2} \|\mathbf{x}_{t+1} - \mathbf{x}_t\|_2^2, \end{aligned}$$

589 where the first inequality on the first line is due to Assumption 3.1 and the second inequality holds  
590 trivially. For the case  $t = m_s$ , since  $\|\nabla F(\mathbf{x}_t)\|_2 \leq \|\mathbf{d}_t\|_2 + \|\epsilon_t\|_2$  we have

$$\begin{aligned} F(\mathbf{x}_{t+1}) &\leq F(\mathbf{x}_t) + \langle \nabla F(\mathbf{x}_t), \mathbf{x}_{t+1} - \mathbf{x}_t \rangle + \frac{L}{2} \|\mathbf{x}_{t+1} - \mathbf{x}_t\|_2^2 \\ &\leq F(\mathbf{x}_t) + (\|\mathbf{d}_t\|_2 + \|\epsilon_t\|_2 + Lr/2)r. \end{aligned}$$

591

□

592 **Lemma D.3** (Lemma 6, [17]). Suppose  $-\gamma = \lambda_{\min}(\nabla^2 F(\mathbf{x}_{m_s})) \leq -\epsilon_H$ . Set  $r \leq$   
593  $L\eta_H\epsilon_H/(C\rho)$ ,  $\ell_{\text{thres}} = 2\log(\eta_H\epsilon_H\sqrt{d}LC^{-1}\rho^{-1}\delta^{-1}r^{-1})/(\eta_H\epsilon_H) = \tilde{O}(\eta_H^{-1}\epsilon_H^{-1})$ ,  $\eta_H \leq$   
594  $\min\{1/(16L\log(\eta_H\epsilon_H\sqrt{d}LC^{-1}\rho^{-1}\delta^{-1}r^{-1})), 1/(8CL\log\ell_{\text{thres}})\} = \tilde{O}(L^{-1})$ ,  $b = q = \sqrt{B} \geq$   
595  $16\log(4/\delta)/(\eta_H^2\epsilon_H^2)$ . Let  $\{\mathbf{x}_t\}, \{\mathbf{x}'_t\}$  be two coupled sequences by running Pullback-SPIDER  
596 from  $\mathbf{x}_{m_s+1}, \mathbf{x}'_{m_s+1}$  with  $\mathbf{w}_{m_s+1} = \mathbf{x}_{m_s+1} - \mathbf{x}'_{m_s+1} = r_0\mathbf{e}_1$ , where  $\mathbf{x}_{m_s+1}, \mathbf{x}'_{m_s+1} \in \mathbb{B}_{\mathbf{x}_{m_s}}(r)$ ,  
597  $r_0 = \delta r/\sqrt{d}$  and  $\mathbf{e}_1$  denotes the smallest eigenvector direction of Hessian  $\nabla^2 F(\mathbf{x}_{m_s})$ . Then with  
598 probability at least  $1 - \delta$ ,

$$\max_{m_s < t < m_s + \ell_{\text{thres}}} \{\|\mathbf{x}_t - \mathbf{x}_{m_s}\|_2, \|\mathbf{x}_0 - \mathbf{x}_{m_s}\|_2\} \geq \frac{L\eta_H\epsilon_H}{C\rho}, \quad (\text{D.2})$$

599 where  $C = O(\log(d\ell_{\text{thres}}/\delta)) = \tilde{O}(1)$ .
